# Supplementary material for: Tumor Promoting Effects of Sulforaphane on Diethylnitrosamine-Induced Murine Hepatocarcinogenesis
Source: MDPI journal article supplement (doi:10.3390/ijms23105397), 2022-05-12
Supplement: s1 [file s1]

Supplementary Table S1. Detailed information of all liver specimens from vehicle- and DEN-treated mice.

| Specimen ID | Genotype | Base Position | Genotype Result | User Edit | QV | Base Position Coverage | Amplicon ID        | Layer ID    | ROI ID       | ROI Position | Genotype Comments |
|-------------|----------|---------------|-----------------|-----------|----|------------------------|--------------------|-------------|--------------|--------------|-------------------|
| DEN1-1004   | 1910t>W  | 1910          | -               | no        | 65 | 2X                     | Mus_Braf_V637<br>E | NP_647455.3 | NP_647455.3_ | 2077         | region_1          |
| DEN2-1004   | 1910t>W  | 1910          | -               | no        | 65 | 2X                     | Mus_Braf_V637<br>E | NP_647455.3 | NP_647455.3_ | 2077         | region_1          |
| DEN3-1004   | [=]+[=]  | 1910          | -               | no        | 65 | 2X                     | Mus_Braf_V637<br>E | NP_647455.3 | NP_647455.3_ | 2077         | region_1          |
| DEN4-1004   | 1910t>W  | 1910          | -               | no        | 52 | 2X                     | Mus_Braf_V637<br>E | NP_647455.3 | NP_647455.3_ | 2077         | region_1          |
| DEN5-1004   | [=]+[=]  | 1910          | -               | no        | 65 | 2X                     | Mus_Braf_V637<br>E | NP_647455.3 | NP_647455.3_ | 2077         | region_1          |
| DEN6-1004   | 1910t>W  | 1910          | -               | no        | 65 | 2X                     | Mus_Braf_V637<br>E | NP_647455.3 | NP_647455.3_ | 2077         | region_1          |
| DEN7-1004   | [=]+[=]  | 1910          | -               | no        | 65 | 2X                     | Mus_Braf_V637<br>E | NP_647455.3 | NP_647455.3_ | 2077         | region_1          |
| NC1-1004    | [=]+[=]  | 1910          | -               | no        | 49 | 2X                     | Mus_Braf_V637<br>E | NP_647455.3 | NP_647455.3_ | 2077         | region_1          |
| NC2-1004    | [=]+[=]  | 1910          | -               | no        | 65 | 2X                     | Mus_Braf_V637<br>E | NP_647455.3 | NP_647455.3_ | 2077         | region_1          |
| NC3-1004    | [=]+[=]  | 1910          | -               | no        | 47 | 2X                     | Mus_Braf_V637<br>E | NP_647455.3 | NP_647455.3_ | 2077         | region_1          |
| NC4-1004    | [=]+[=]  | 1910          | -               | no        | 65 | 2X                     | Mus_Braf_V637<br>E | NP_647455.3 | NP_647455.3_ | 2077         | region_1          |
| NC5-1004    | [=]+[=]  | 1910          | -               | no        | 65 | 2X                     | Mus_Braf_V637<br>E | NP_647455.3 | NP_647455.3_ | 2077         | region_1          |
| NC6-1004    | [=]+[=]  | 1910          | -               | no        | 46 | 2X                     | Mus_Braf_V637<br>E | NP_647455.3 | NP_647455.3_ | 2077         | region_1          |
| NC7-1004    | [=]+[=]  | 1910          | -               | no        | 40 | 2X                     | Mus_Braf_V637<br>E | NP_647455.3 | NP_647455.3_ | 2077         | region_1          |

A

| Primer name            | Sequence                           | PCR size (bp) | Tm. |
|------------------------|------------------------------------|---------------|-----|
| Mus_Braf_V637E_2F_M13F | GTAAACGACGGCCAGTTTCCTTTACTTACTGCAC | 290           | 60  |
| Mus_Braf_V637E_R       | GCAATTATGCCTGGCTTACA               |               |     |

B

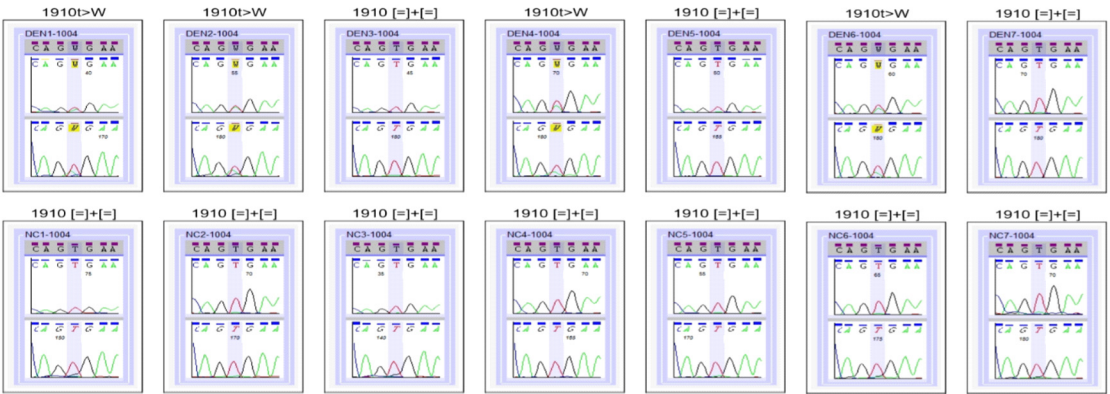

Supplementary Figure S1. *B-Raf*<sup>V637E</sup> mutation detected in DEN-induced liver tumors. Total RNA was extracted from vehicle- or DEN-treated liver tissue with the DNeasy® Blood & Tissue Kit, and converted to cDNA using reverse transcriptase

following the standard procedure. The cDNA region bearing murine *B-Raf* gene was amplified using PCR with HiPi Tag polymerase. The PCR products were purified by the QIAquick Purification Kit. **(A)** Designed primers for sequencing are listed, GTAAAACGACGGCCAGT sequence represents M13F primer. **(B)** Sequences of the genetic variants in murine *B-Raf*<sup>V637E</sup> were detected by capillary electrophoresis.

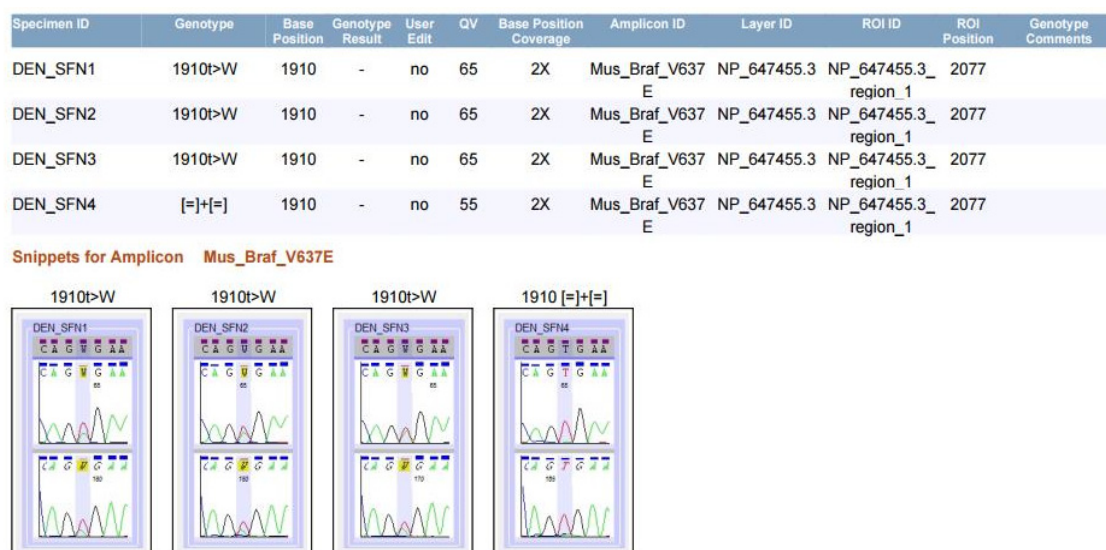

**Supplementary Figure S2. *B-Raf*<sup>V637E</sup> mutation detected in SFN-treated DEN-induced liver tumors.** Sequencing was performed and cleaned up with the BigDye® Terminator v3.1 Cycle Sequencing Kit. Sequences were detected and analyzed by ABI PRISM 3730XL Analyzer. Sequences of the genetic variants in murine *B-Raf*<sup>V637E</sup> were detected by capillary electrophoresis. Three out of 4 cases of *B-Raf*<sup>V637E</sup> mutation (labelled by yellow color) were detected by capillary electrophoresis in SFN plus DEN-induced liver tumors.

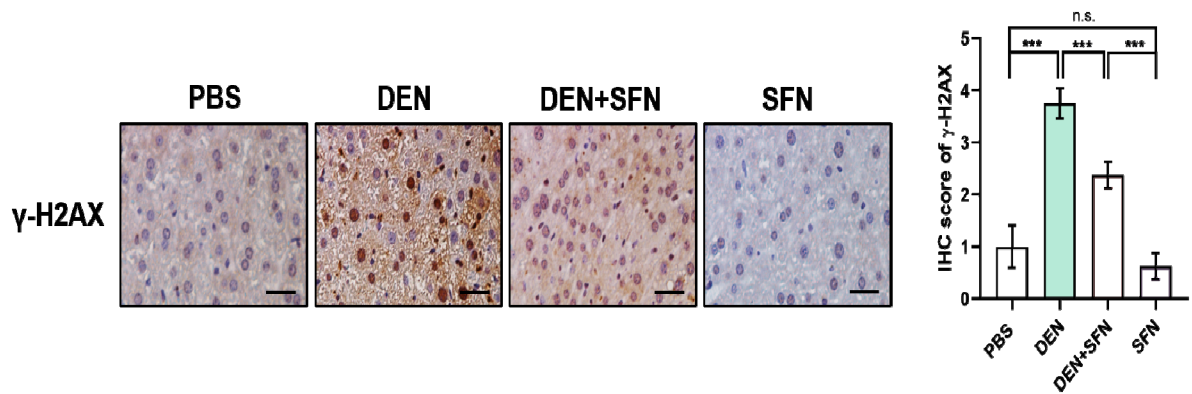

**Supplementary Figure S3. Immunohistochemical analysis of  $\gamma$ -H2AX in DEN-induced murine hepatocarcinogenesis with and without SFN administration.** The paraffin sections of liver tissues were subjected to immunohistochemical staining with an antibody against  $\gamma$ -H2AX. The IHC score was analyzed by the image processing program Image ,J and results are shown as the mean  $\pm$  SD of 4 samples for each group. \*\*\* $p < 0.001$ ; n.s.: non-significant. Representative images of stained sections are displayed. Scale bar, 100  $\mu$ m.
